# Supplementary material for: Checklists to reduce diagnostic error: a systematic review of the literature using a human factors framework
Source: HighWire-hosted journal article supplement (doi:10.1136/bmjopen-2021-058219), 2022-04-01
Supplement: bmjopen-2021-058219supp001_data_supplement.pdf [file bmjopen-2021-058219supp001_data_supplement.pdf]

## APPENDIX

### Contents:

- 1) Search strategy
- 2) Date extraction form
- 3) Quality Assessment Tools
- 4) Figure 1: Bar chart for categorization of articles containing diagnostic checklists based on SEIPS and their reported outcomes
- 5) Table 1: Quality and risk of bias assessment
- 6) Table 2: Checklists with physical “box checking” component
- 7) Table 3: List of checklists with examples of how their components fit into SEIPS categories

## DIAGNOSTIC ERRORS & CHECKLISTS SEARCH STRATEGY (PAGES 1-2)

### Search 1:

Whitney Townsend, MLIS

whitneyt@umich.edu

All searches run from inception of database through 4/30/2019

No limits applied

PubMed (Medline + unindexed)

Embase.com

Scopus

Web of Science Core Collection

Total citations: 4812

Citations after Endnote automated deduplication: 2965 (removed 1847 duplicates)

#### 1. PubMed (1691 on 4/30/2019)

("Checklist"[Mesh] OR checklist[tw] OR checklists[tw] OR "check list"[tw] OR "check lists"[tw] OR prechecklist\*[tw] OR postchecklist\*[tw] OR "Safety check"[tw] OR "safety checks"[tw] OR huddle[tw] OR pause\*[tw] OR "universal protocol"[tw] OR "universal protocols"[tw] OR briefing[tw]) AND ("Diagnosis, Differential"[Mesh] OR "Diagnosis/adverse effects"[Mesh] OR (differential\*[tw] AND diagnos\*[tiab]) OR "Diagnostic Errors"[Mesh] OR "diagnostic error"[tw] OR "diagnostic errors"[tw] OR "wrong diagnosis"[tw] OR "false positive"[tw] OR "false negative"[tw] OR misdiagnose[tw] OR misdiagnosed[tw] OR misdiagnosis[tw] OR misdiagnoses[tw] OR misdiagnosing[tw])

#### 2. Embase (1153 on 4/30/2019)

('Checklist'/exp OR checklist:ti,ab,de,tn OR checklists:ti,ab,de,tn OR "check list":ti,ab,de,tn OR "check lists":ti,ab,de,tn OR prechecklist\*:ti,ab,de,tn OR postchecklist\*:ti,ab,de,tn OR "Safety check":ti,ab,de,tn OR "safety checks":ti,ab,de,tn OR huddle:ti,ab,de,tn OR pause\*:ti,ab,de,tn OR "universal protocol":ti,ab,de,tn OR "universal protocols":ti,ab,de,tn OR briefing:ti,ab,de,tn) AND ('Differential Diagnosis'/exp OR (differential\*:ti,ab AND diagnos\*:ti,ab) OR 'Diagnostic Error'/exp OR "diagnostic error":ti,ab,de,tn OR "diagnostic errors":ti,ab,de,tn OR "wrong diagnosis":ti,ab,de,tn OR "false positive":ti,ab,de,tn OR "false negative":ti,ab,de,tn OR misdiagnose:ti,ab,de,tn OR misdiagnosed:ti,ab,de,tn OR misdiagnosis:ti,ab,de,tn OR misdiagnoses:ti,ab,de,tn OR misdiagnosing:ti,ab,de,tn)

#### 3. Scopus (1384 on 4/30/2019)

(INDEXTERMS(Checklist) OR TITLE-ABS-KEY(checklist) OR TITLE-ABS-KEY(checklists) OR TITLE-ABS-KEY({check list}) OR TITLE-ABS-KEY({check lists}) OR TITLE-ABS-KEY({check-list}) OR TITLE-ABS-KEY({check-lists}) OR TITLE-ABS-KEY(prechecklist\*) OR TITLE-ABS-KEY(postchecklist\*) OR TITLE-ABS-KEY({Safety check}) OR TITLE-ABS-KEY({safety checks}) OR TITLE-ABS-KEY(huddle) OR TITLE-ABS-KEY(pause\*) OR TITLE-ABS-KEY({universal protocol}) OR TITLE-ABS-KEY({universal protocols}) OR TITLE-ABS-

KEY(briefing)) AND (INDEXTERMS({Diagnosis, Differential}) OR INDEXTERMS({Diagnosis/adverse effects}) OR (TITLE-ABS-KEY(differential\*) AND TITLE-ABS(diagnos\*)) OR INDEXTERMS({Diagnostic Errors}) OR TITLE-ABS-KEY({diagnostic error}) OR TITLE-ABS-KEY({diagnostic errors}) OR TITLE-ABS-KEY({wrong diagnosis}) OR TITLE-ABS-KEY({false positive}) OR TITLE-ABS-KEY({false negative}) OR TITLE-ABS-KEY(misdiagnose) OR TITLE-ABS-KEY(misdiagnosed) OR TITLE-ABS-KEY(misdiagnosis) OR TITLE-ABS-KEY(misdiagnoses) OR TITLE-ABS-KEY(misdiagnosing))

#### 4. **Web of Science Core Collection (584 on 4/30/2019)**

TS=(checklist\* OR "check list" OR "check lists" OR "check-list" OR "check-lists" OR prechecklist\* OR postchecklist\* OR "Safety check" OR "safety checks" OR "huddle" OR pause\* OR "universal protocol" OR "universal protocols" OR "briefing") AND ("Diagnosis, Differential" OR "Diagnosis/adverse effects" OR (differential\* AND diagnos\*) OR "diagnostic error" OR "diagnostic errors" OR "wrong diagnosis" OR "false positive" OR "false negative" OR misdiagnose OR misdiagnosed OR misdiagnosis OR misdiagnoses OR misdiagnosing)

#### **Search 2:**

Whitney Townsend, MLIS

whitneyt@umich.edu

All searches run from 05/01/2019-03/12/2021

Total Citations: 575 (total before deduplication)

Citations after Covidence automated deduplication: 332 (removed 243 duplicates)

#### **Pubmed (150 results)**

[Prior Search] AND (("2019/05/01"[CRDT] : "3000"[CRDT]) OR ("2019/05/01"[EDAT] : "3000"[EDAT]) OR ("2019/05/01"[MHDA] : "3000"[MHDA]))

#### **Embase.com (217 results)**

[Prior Search] AND [1-5-2019]/sd NOT [13-3-2021]/sd

#### **Scopus (116 results)**

[Prior Search] AND ( ORIG-LOAD-DATE > 20190501 )

#### **Web of Science (92 results)**

[Prior Search] AND (LD=(2019-05-01/2021-03-12))

#### **Search 3:**

February 15, 2022 Search Update

Whitney Townsend, MLIS

whitneyt@umich.edu

All searches re-run and deduplicated against prior results sets. Numbers indicate new citations after deduplication.

**Total New Unique Citations: 247**

**Pubmed** (1902 results; 96 unique results)

**Embase.com** (1476 results; 80 unique results)

**Scopus** (1610 results; 32 unique results)

**Web of Science** (773 results; 39 unique results)

**Total: 5761 results, 3444 after deduplication in Endnote**

- PubMed: 1902, 1902 after deduplication
- Embase.com: 1476, 901 after deduplication
- Scopus: 1610, 399 after deduplication
- Web of Science: 773, 302 after deduplication

**\*Further deduplication with Covidence resulted in 3186 articles and a total of 2575 duplicates.**

**DATA EXTRACTION FORM (ADOPTED FROM COCHRANE; PAGES 3-6)**

**Title of the Systematic Review:** CHECKLISTS TO REDUCE DIAGNOSTIC ERROR: A SYSTEMATIC REVIEW OF THE LITERATURE USING A HUMAN FACTORS FRAMEWORK

**General Information**

|                                                                                                                                                                                                            |  |
|------------------------------------------------------------------------------------------------------------------------------------------------------------------------------------------------------------|--|
| <b>2. Article title</b>                                                                                                                                                                                    |  |
| <b>3. Study ID</b> (1 <sup>st</sup> author's last name and year)                                                                                                                                           |  |
| <b>4. Domain</b> (i.e. diagnostic error)                                                                                                                                                                   |  |
| <b>5. Study Design</b> (i.e. RCT, Case-Control, Cohort, Observational)                                                                                                                                     |  |
| <b>6. Population Description</b> (i.e. M4s, Residents, PCPs, EM physicians, etc. Also include number of participants, total, and how many in each study arm i.e. control arm, intervention, arm, RCT arms) |  |
| <b>7. Intervention Type</b> (i.e. debiasing or ddx checklist, also algorithm or flow diagram)                                                                                                              |  |
| <b>Intervention Description</b> (i.e. checklist on EKGs ddx, chest pain ddx, etc. Also describe how was the intervention rolled out)                                                                       |  |
| <b>Study setting</b> (i.e. simulation lab, primary care clinics, ERs)                                                                                                                                      |  |
| <b>8. Primary Outcome Description</b>                                                                                                                                                                      |  |
| <b>9. Secondary Outcome Description</b>                                                                                                                                                                    |  |
| <b>10. Impact on Outcomes</b> (including statistical significance)                                                                                                                                         |  |
| <b>Notes:</b>                                                                                                                                                                                              |  |

**Checklists Content Categories Based on SEIPS 2.0\***

| <b>Checklist</b> | <b>Sociotechnical Work System</b><br>(i.e. person(s), tasks, tools and technologies, organization, internal environment, and external environment) | <b>Processes</b> (i.e. physical, cognitive, and social/behavioral <i>performance</i> processes) | <b>Outcomes</b> (i.e. patient, professional, and organizational outcomes) |
|------------------|----------------------------------------------------------------------------------------------------------------------------------------------------|-------------------------------------------------------------------------------------------------|---------------------------------------------------------------------------|
|                  |                                                                                                                                                    |                                                                                                 |                                                                           |
|                  |                                                                                                                                                    |                                                                                                 |                                                                           |
|                  |                                                                                                                                                    |                                                                                                 |                                                                           |

\*Created by the authors, who have the permission to reuse the table.

**IF checklist is “Cognitive”, then further describe\*:**

| <b>Checklist</b> | <b>Does the checklist specifically point out urgent/emergent conditions (if so, specify if prioritized)?</b> | <b>Does the checklist include a list differential diagnosis?</b> | <b>Does the checklist have other components (aside from ddx) such as exam or history or tests (if so, specify)?</b> | <b>Does the checklist specifically point out “common pitfalls/biases”?</b> |
|------------------|--------------------------------------------------------------------------------------------------------------|------------------------------------------------------------------|---------------------------------------------------------------------------------------------------------------------|----------------------------------------------------------------------------|
|                  |                                                                                                              |                                                                  |                                                                                                                     |                                                                            |
|                  |                                                                                                              |                                                                  |                                                                                                                     |                                                                            |
|                  |                                                                                                              |                                                                  |                                                                                                                     |                                                                            |

\*Created by the authors, who have the permission to reuse the table.

**Checklists in article:**

**Quality Assessment Tools:**

- Cochrane's Risk of Bias (RoB) 2.0 tool: <https://methods.cochrane.org/bias/resources/rob-2-revised-cochrane-risk-bias-tool-randomized-trials>
- Risk Of Bias In Non-randomized Studies of Interventions (ROBINS-I) tool: <https://methods.cochrane.org/methods-cochrane/robins-i-tool>
- Newcastle-Ottawa Scale for Cohort Studies: [http://www.ohri.ca/programs/clinical\\_epidemiology/nosgen.pdf](http://www.ohri.ca/programs/clinical_epidemiology/nosgen.pdf)
- NIH Quality Assessment Tool for Pre-Posttest Studies: <https://www.nhlbi.nih.gov/health-topics/study-quality-assessment-tools>

**Figure 1<sup>\*</sup>: Categorization of articles containing diagnostic checklists based on SEIPS 2.0 and their reported outcomes**

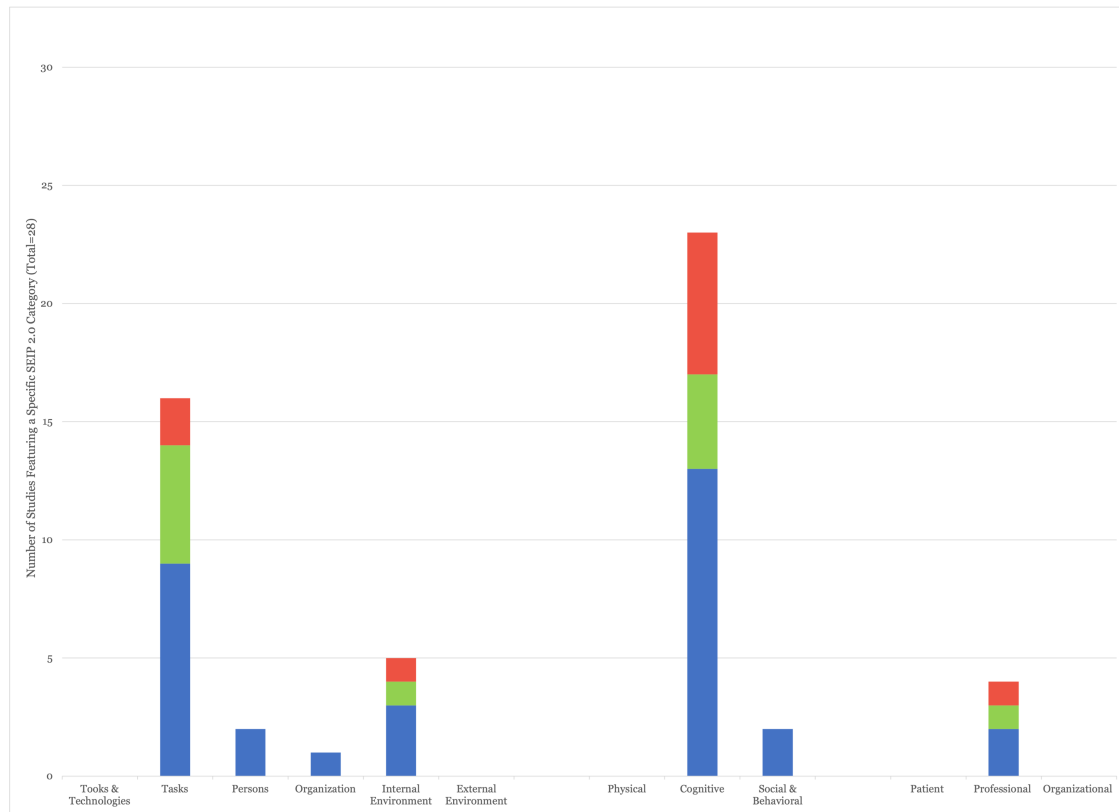

<sup>\*</sup>Created by the authors, who have the permission to reuse the figure.

\*Blue: opinion-based articles containing clinical diagnosis checklists or studies reporting results on user perception.

\*Green: studies containing checklists that showed improvement in reducing diagnostic error.

\*Red: studies containing checklists that didn't show improvement in reducing diagnostic error.



**Table 1\* : Quality and Risk of Bias Assessment**

| Study ID                   | Study Design                                | Checklist                                                             | Quality Assessment      |
|----------------------------|---------------------------------------------|-----------------------------------------------------------------------|-------------------------|
| Ely 2015                   | RCT                                         | Ely's DDx checklists                                                  | (RoB 2.0) Some concerns |
| Nickerson 2019             | RCT                                         | ECG syncope checklist                                                 | (RoB 2.0) Low risk      |
| O'Sullivan 2019            | RCT                                         | Mnemonic tool (SLOW) <sup>a</sup>                                     | (RoB 2.0) Some concerns |
| Sibbald 2019               | RCT                                         | General debiasing checklist (Ely 2011)                                | (RoB 2.0) Some concerns |
|                            |                                             | ECG interpretation checklist                                          |                         |
| Kok 2017                   | RCT                                         | Chest radiograph interpretation checklist                             | (RoB 2.0) Low risk      |
| Sibbald 2015               | RCT                                         | ECG interpretation checklist                                          | (RoB 2.0) Low risk      |
| Chew 2016                  | Quasi-experimental                          | Mnemonic tool (TWED) <sup>b</sup>                                     | (ROBINS-I) Low risk     |
| Chew 2017                  | Quasi-experimental                          | Mnemonic tool (TWED)                                                  | (ROBINS-I) Low risk     |
| Sibbald 2013 <sup>45</sup> | Pre-Posttest (no control)                   | ECG interpretation checklist                                          | (NIH) Fair              |
| Sibbald 2013 <sup>46</sup> | Pre-Posttest (no control)                   | Checklist for cardiac exam                                            | (NIH) Good              |
| Sibbald 2014               | Pre-Posttest (no control)                   | ECG interpretation checklist                                          | (NIH) Good              |
| Kilian 2019                | Pre-Posttest (no control)                   | Mnemonic tool (ACT) <sup>c</sup>                                      | (NIH) Poor              |
| Shimizu 2013               | Pre-Posttest (two study groups, no control) | General debiasing checklist (Ely 2011)                                | (NIH) Fair              |
|                            |                                             | Symptom-specific DDx checklist (similar to Ely's 2011 DDx checklists) |                         |
| Pan 2021                   | Retrospective Cohort                        | Abdominal pain checklist                                              | (NOS) Good quality      |

\*Created by the authors, who have the permission to reuse the table.

<sup>a</sup> SLOW: S=Sure about that?; L=Look at date, what is Lacking?; O=What if Opposite is true?; S=Worst case scenario

<sup>b</sup> TWED: T=Threat, W=What else, E=Evidence and D=Dispositional factors

<sup>c</sup> ACT: three questions evaluating A=Alternatives, C=Consequences, T=Traits

**Table 2\*:** Checklists with Physical “Box Checking” Component<sup>a</sup>

| Study ID        | Study Design                                  | Checklist                                                     | Work Systems                                       | Processes             | Outcomes     |
|-----------------|-----------------------------------------------|---------------------------------------------------------------|----------------------------------------------------|-----------------------|--------------|
| O’Sullivan 2019 | RCT                                           | Mnemonic (SLOW) meant to slow down reasoning and counter bias |                                                    | Cognitive             |              |
| Ely 2016        | Expert opinion                                | General checklist for mental pause                            | Internal environment, Tasks, Organization, Persons | Cognitive             | Professional |
| Graber 2014     | Pre and posttest (interviews/user perception) | Checklist for high-risk diagnostic error                      | Persons                                            | Cognitive             |              |
| Huang 2017      | Pre and posttest, focus groups, chart audits  | Diagnostic pause tool                                         | Tasks                                              | Cognitive             |              |
| Nedorost 2018   | Observational and survey                      | Dermatitis checklist                                          | Tasks                                              | Social and Behavioral |              |

\*Created by the authors, who have the permission to reuse the table.

<sup>a</sup>Studies of checklists that reported on whether a checklist reduced diagnostic error (orange shade) vs those that reported expert opinion or user perception (gray shade)

**Table 3\* : List of Checklists**

| Study ID     | Checklist                                                              | URL                                                                                                                                                                                                                             | Work Systems                                                                                                                                                                                                                      | Processes                                                                                                                   | Outcomes                                                        |
|--------------|------------------------------------------------------------------------|---------------------------------------------------------------------------------------------------------------------------------------------------------------------------------------------------------------------------------|-----------------------------------------------------------------------------------------------------------------------------------------------------------------------------------------------------------------------------------|-----------------------------------------------------------------------------------------------------------------------------|-----------------------------------------------------------------|
| Bahrami 2009 | Radiology interpretation checklist for brain                           | <a href="https://pubs.rsna.org/cms/10.1148/rg.297095123/asset/images/large/g09nv14t02x.jpeg">https://pubs.rsna.org/cms/10.1148/rg.297095123/asset/images/large/g09nv14t02x.jpeg</a>                                             | <b>Tasks</b> (e.g., take “clinical history” and check “sulci”)                                                                                                                                                                    |                                                                                                                             |                                                                 |
| Bello 2019   | Radiology interpretation checklist for skull base                      | <a href="https://pubs.rsna.org/cms/10.1148/rg.2019180118/asset/images/large/rg.2019180118.tb11.jpeg">https://pubs.rsna.org/cms/10.1148/rg.2019180118/asset/images/large/rg.2019180118.tb11.jpeg</a>                             | <b>Tasks</b> (e.g., “Anterior: Look for fractures”)                                                                                                                                                                               |                                                                                                                             |                                                                 |
| Chew 2016    | Mnemonic tool (TWED) <sup>b</sup> meant to facilitate metacognition    | <a href="http://www.smj.org.sg/sites/default/files/SMJ-57-694-g002.jpg">http://www.smj.org.sg/sites/default/files/SMJ-57-694-g002.jpg</a>                                                                                       | <b>Internal environment</b> (e.g., “chaotic, busy working place”)                                                                                                                                                                 | <b>Cognitive</b> (e.g., “what if I’m wrong? What else could it be?”)                                                        | <b>Professional</b> (e.g., “emotional – sleepiness, tiredness”) |
| Ely 2011     | General debiasing checklist                                            | <a href="https://images.journals.lww.com/academicmedicine/ArticleViewerPreview.0001888-201103000-00017.T2-17.jpeg">https://images.journals.lww.com/academicmedicine/ArticleViewerPreview.0001888-201103000-00017.T2-17.jpeg</a> | <b>Tasks</b> (e.g., “ensure a pathway for follow-up”)                                                                                                                                                                             | <b>Cognitive</b> (e.g., “Was my judgement affected by any other bias?”)                                                     |                                                                 |
|              | Ely’s differential diagnosis (DDx) checklists                          | <a href="https://images.journals.lww.com/academicmedicine/ArticleViewerPreview.0001888-201103000-00017.T3-17.jpeg">https://images.journals.lww.com/academicmedicine/ArticleViewerPreview.0001888-201103000-00017.T3-17.jpeg</a> |                                                                                                                                                                                                                                   | <b>Cognitive</b> (e.g., “Sinus tachycardia” listing ddx as “anxiety” and “myocardial infarction”)                           |                                                                 |
|              | Disease-specific cognitive forcing checklist                           | <a href="https://images.journals.lww.com/academicmedicine/ArticleViewerPreview.0001888-201103000-00017.T4-17.jpeg">https://images.journals.lww.com/academicmedicine/ArticleViewerPreview.0001888-201103000-00017.T4-17.jpeg</a> | <b>Tasks</b> (e.g., perform “anterior drawer test”)                                                                                                                                                                               | <b>Cognitive</b> (e.g., listing pitfalls for ankle injury, such as “missed neurovascular injury”)                           |                                                                 |
| Ely 2016     | General checklist for mental pause                                     | <a href="https://www.aafp.org/afp/2016/0915/hires/afp20160915p426-t1.gif">https://www.aafp.org/afp/2016/0915/hires/afp20160915p426-t1.gif</a>                                                                                   | <b>Internal environment</b> (e.g., “distracted”), <b>Tasks</b> (e.g., “take the history, do the physical exam”), <b>Organization</b> (e.g., “time pressure (behind schedule)”), <b>Persons</b> (e.g., “patient drunk or hostile”) | <b>Cognitive</b> (e.g., “Did I just accept the first diagnosis that came to mind without considering other possibilities?”) | <b>Professional</b> (e.g., “physician fatigued” or “angry”)     |
| Graber 2014  | Checklist for high-risk diagnostic error                               | <a href="https://www.degruyter.com/document/doi/10.1515/dx-2014-0019/asset/graphic/dx-2014-0019_fig2.jpg">https://www.degruyter.com/document/doi/10.1515/dx-2014-0019/asset/graphic/dx-2014-0019_fig2.jpg</a>                   | <b>Internal environment</b> (e.g., “was I interrupted/distracted”), <b>Persons</b> (e.g., “is this a patient I don’t like for some reason? Or like too much?”)                                                                    | <b>Cognitive</b> (e.g., “Are there any pieces that don’t fit?”)                                                             |                                                                 |
| Hess 2008    | Lower extremity ulcer checklist                                        | <a href="https://images.journals.lww.com/aswcjournal/Original.00129334-201010000-00012.TU1-12.jpeg">https://images.journals.lww.com/aswcjournal/Original.00129334-201010000-00012.TU1-12.jpeg</a>                               |                                                                                                                                                                                                                                   | <b>Cognitive</b> (e.g., “Infectious disorders” with ddx listed as “Bacterial... Fungal... Parasitic”)                       |                                                                 |
| Huang 2017   | Diagnostic pause tool                                                  | <a href="https://qualitysafety.bmj.com/content/27/6/492.full">https://qualitysafety.bmj.com/content/27/6/492.full</a>                                                                                                           | <b>Tasks</b> (e.g., “Make a medication change”)                                                                                                                                                                                   | <b>Cognitive</b> (e.g., “What features of the case go against this diagnosis?”)                                             |                                                                 |
| Kilian 2019  | Mnemonic tool (ACT) <sup>c</sup> meant to elicit diagnostic reflection | <a href="https://www.degruyter.com/document/doi/10.1515/dx-2018-0073/html">https://www.degruyter.com/document/doi/10.1515/dx-2018-0073/html</a>                                                                                 |                                                                                                                                                                                                                                   | <b>Cognitive</b> (e.g., “Is there contradictory evidence?”)                                                                 |                                                                 |
| Kok 2017     | Chest radiograph interpretation checklist                              | <a href="https://link.springer.com/article/10.1007/s10278-017-9979-0/tables/1">https://link.springer.com/article/10.1007/s10278-017-9979-0/tables/1</a>                                                                         | <b>Tasks</b> (e.g., check “Heart-large vessels” and “Trachea”)                                                                                                                                                                    | <b>Cognitive</b> (e.g., lists potential pitfalls such as “Wrong patient” and “Wrong data”).                                 |                                                                 |
| Li 2022      | Checklist of causes of abdominal pain                                  | <a href="https://www.sciencedirect.com/science/article/pii/S1015958421007077?via%3Dihub#tbl1">https://www.sciencedirect.com/science/article/pii/S1015958421007077?via%3Dihub#tbl1</a>                                           |                                                                                                                                                                                                                                   | <b>Cognitive</b> (e.g., list of “common diseases” classified under the “acute inflammatory”)                                |                                                                 |

|                            |                                                                                 |                                                                                                                                                                                                                                                                                                                   |                                                                                                             | category)                                                                                                                                  |
|----------------------------|---------------------------------------------------------------------------------|-------------------------------------------------------------------------------------------------------------------------------------------------------------------------------------------------------------------------------------------------------------------------------------------------------------------|-------------------------------------------------------------------------------------------------------------|--------------------------------------------------------------------------------------------------------------------------------------------|
| Nedorost 2018              | Dermatitis checklist                                                            | <a href="https://www.ncbi.nlm.nih.gov/pmc/articles/PMC6217130/table/t1-ccid-11-545/?report=objectonly">https://www.ncbi.nlm.nih.gov/pmc/articles/PMC6217130/table/t1-ccid-11-545/?report=objectonly</a>                                                                                                           | <b>Tasks</b> (e.g., “Examine for signs of (often amyopathic) dermatomyositis”)                              | <b>Social and Behavioral</b> (e.g., “Framing communication”)                                                                               |
| Nickerson 2019             | Electrocardiogram (ECG) syncope checklist                                       | <a href="https://www.sciencedirect.com/science/article/abs/pii/S0735675719302141?via%3Dihub">https://www.sciencedirect.com/science/article/abs/pii/S0735675719302141?via%3Dihub</a>                                                                                                                               |                                                                                                             | <b>Cognitive</b> (e.g., “Below is a list of conditions that may cause syncope”)                                                            |
| Nordick 2020               | DaRT – Diagnostic and Reasoning Tool                                            | <a href="https://journals.lww.com/janp/Abstract/2021/05000/Integrating_strategies_for_improving_diagnostic.7.aspx">https://journals.lww.com/janp/Abstract/2021/05000/Integrating_strategies_for_improving_diagnostic.7.aspx</a>                                                                                   | <b>Tasks</b> (e.g., “Patient encounter” includes “History of Present Illness” and Physical Exam”)           | <b>Cognitive</b> (e.g., “What are the initial possible diagnoses?”)                                                                        |
| O’Sullivan 2018            | Debiasing checklist                                                             | <a href="https://www.rcpe.ac.uk/sites/default/files/jrcpe_48_3_osullivan.pdf">https://www.rcpe.ac.uk/sites/default/files/jrcpe_48_3_osullivan.pdf</a>                                                                                                                                                             |                                                                                                             | <b>Cognitive</b> (e.g., “Be aware of base rates for your differentials”)                                                                   |
| O’Sullivan 2019            | Mnemonic tool (SLOW) <sup>4</sup> meant to slow down reasoning and counter bias | <a href="https://media.springernature.com/lw685/springer-static/image/art%3A10.1186%2Fs12909-018-1444-3/MediaObjects/12909_2018_1444_Fig1_HTML.png?as=webp">https://media.springernature.com/lw685/springer-static/image/art%3A10.1186%2Fs12909-018-1444-3/MediaObjects/12909_2018_1444_Fig1_HTML.png?as=webp</a> |                                                                                                             | <b>Cognitive</b> (e.g., “What if the opposite is true?”)                                                                                   |
| Pan 2021                   | Abdominal pain checklist and algorithm                                          | <a href="https://www.ncbi.nlm.nih.gov/pmc/articles/PMC7924112/table/t0001/?report=objectonly">https://www.ncbi.nlm.nih.gov/pmc/articles/PMC7924112/table/t0001/?report=objectonly</a>                                                                                                                             |                                                                                                             | <b>Cognitive</b> (e.g., Causes of “Abdominal pain” including “Anatomical Localization,” “Category of Etiology” and “Acute Common Disease”) |
| Rush 2017                  | Mnemonic tool (CARE) <sup>6</sup> meant to counter bias                         | <a href="https://onlinelibrary.wiley.com/doi/10.1111/ijd.13532">https://onlinelibrary.wiley.com/doi/10.1111/ijd.13532</a>                                                                                                                                                                                         | <b>Tasks</b> (e.g., “Enact a plan”)                                                                         | <b>Cognitive</b> (e.g., “Assess for biases”),<br><b>Social and Behavioral</b> (e.g., “Communicate with your team and patient”)             |
| Shimizu 2013               | Symptom-specific DDX checklist (similar to Ely’s 2011 DDX checklists)           | <a href="https://www.tandfonline.com/doi/full/10.3109/0142159X.2012.742493">https://www.tandfonline.com/doi/full/10.3109/0142159X.2012.742493</a>                                                                                                                                                                 |                                                                                                             | <b>Cognitive</b> (e.g., “Epigastralgia” causes listed including “gastritis” and “esophageal rupture”)                                      |
| Sibbald 2013 <sup>48</sup> | ECG interpretation checklist                                                    | <a href="https://onlinelibrary.wiley.com/doi/10.1111/medu.12080">https://onlinelibrary.wiley.com/doi/10.1111/medu.12080</a>                                                                                                                                                                                       | <b>Tasks</b> (e.g., “calculate the rate” and “scan the entire strip to confirm the rhythm”)                 |                                                                                                                                            |
| Sibbald 2013 <sup>49</sup> | Checklist for cardiac exam                                                      | <a href="https://qualitysafety.bmj.com/content/22/4/333">https://qualitysafety.bmj.com/content/22/4/333</a>                                                                                                                                                                                                       | <b>Tasks</b> (e.g., fill in descriptors for cardiovascular exam including “carotid,” “JVD,” “S1,” and “S2”) |                                                                                                                                            |
| Weber 1997                 | Checklist for orbital and periorbital swelling                                  | <a href="https://www.tandfonline.com/doi/abs/10.3109/01676839709076362">https://www.tandfonline.com/doi/abs/10.3109/01676839709076362</a>                                                                                                                                                                         |                                                                                                             | <b>Cognitive</b> (e.g., Periorbital “Itching” includes the differentials of “Contact allergy” and “Atopic dermatitis”)                     |
| Yung 1983                  | Flowchart                                                                       | <a href="https://www.sciencedirect.com/science/article/abs/pii/036192308390182X?via%3Dihub">https://www.sciencedirect.com/science/article/abs/pii/036192308390182X?via%3Dihub</a>                                                                                                                                 | <b>Tasks</b> (e.g., Perform “Medical History” and “Ask drug use”)                                           | <b>Cognitive</b> (e.g., “Psychiatric conditions” include “Anxiety tremor” and “Hysteria”)                                                  |

<sup>6</sup>Created by the authors, who have the permission to reuse the table.
